# Supplementary material for: High-Efficient and Recyclable Magnetic Separable Catalyst for Catalytic Hydrogenolysis of β-O-4 Linkage in Lignin
Source: MDPI journal article supplement (doi:10.3390/polym10101077), 2018-09-28
Supplement: s1 [file s1]

Supplementary materials:

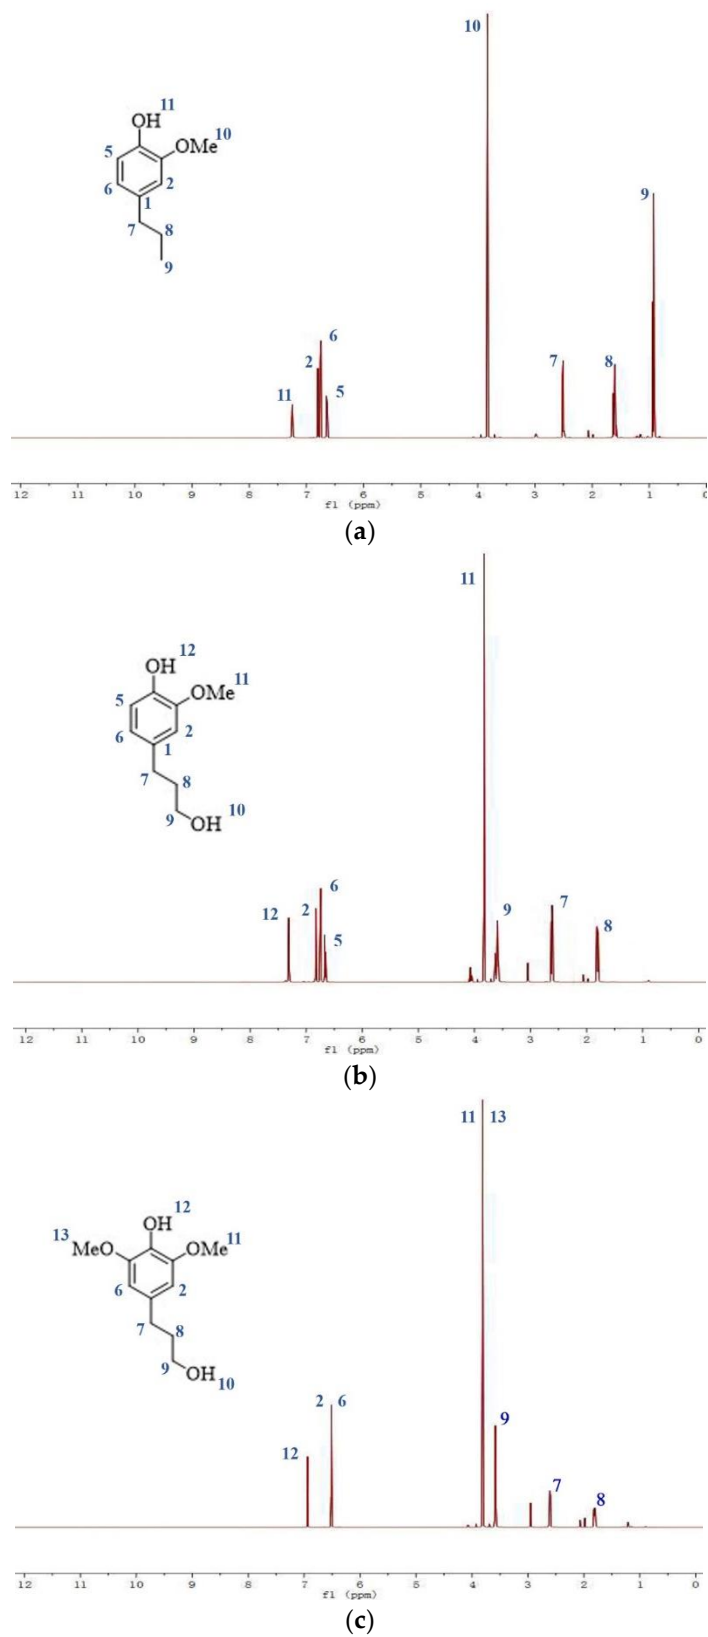

**Figure S1.** The NMR pictures of three identified monomers' standard samples by independent synthesis: (a) G2, (b) monomer 1, (c) S5.

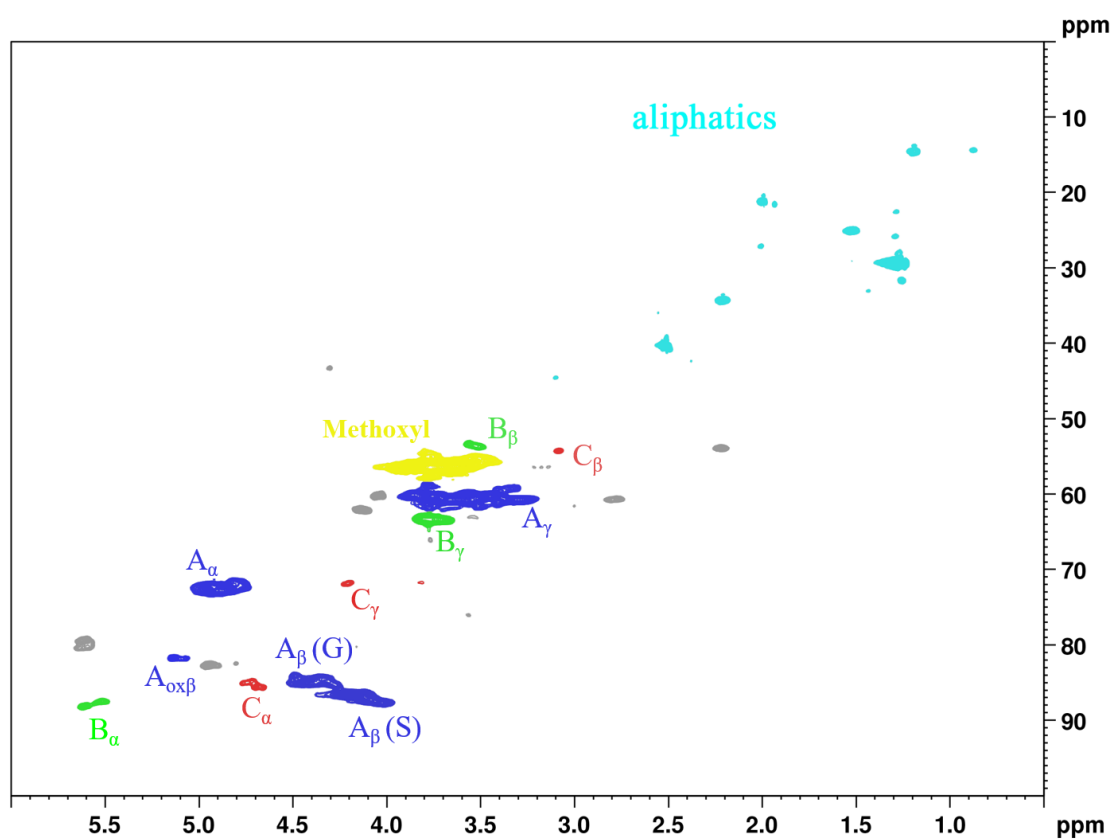

Figure S2. The HSQC picture of bagasse lignin extracted.

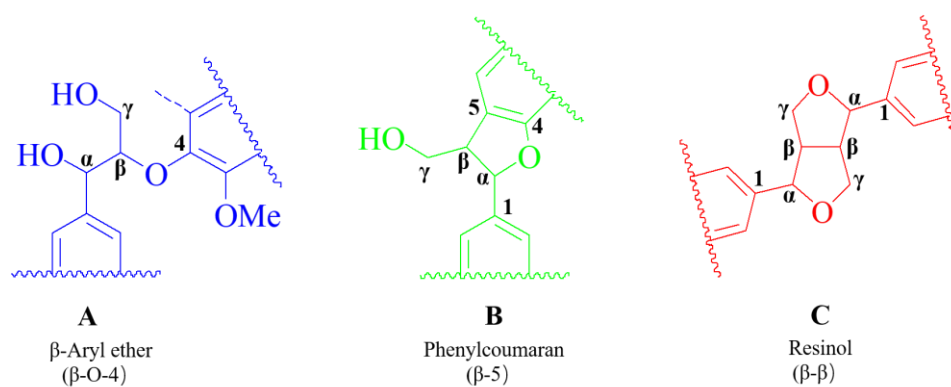

Figure S3. Examples of major linkages in bagasse lignin.
